# Supplementary material for: A Novel Rrm3 Function in Restricting DNA Replication via an Orc5-Binding Domain Is Genetically Separable from Rrm3 Function as an ATPase/Helicase in Facilitating Fork Progression
Source: PubMed Central journal article supplement (PMC5140057; doi:10.1371/journal.pgen.1006451), 2016-12-06
Supplement: pgen.1006451.s005.pdf [file pgen.1006451.s005.pdf]

**S1 Table.** Proteins that undergo significant changes in cells lacking Rrm3 in the presence and absence of HU

| <b>Protein</b> | <b>Fold Change<br/>- HU</b> | <b>Description</b>                                                                                     |
|----------------|-----------------------------|--------------------------------------------------------------------------------------------------------|
| Rad5           | 5.1                         | RING domain-containing ubiquitin ligase involved in error free DNA-damage tolerance pathways           |
| Top2           | 1.9                         | Type II topoisomerase that catalyzes decatenation of DNA                                               |
| Rdh54          | 1.8                         | DNA-dependent ATPase with function in homologous recombination                                         |
| Smc1           | 1.5                         | Subunit of the cohesin complex that associates with SMC3 and is required for sister chromatid cohesion |
| Sif2           | 1.5                         | Subunit of Set3C histone deacetylase complex                                                           |
| Mgm101         | 1.4                         | Role in mitochondrial DNA recombinational repair and interstrand cross-link repair                     |
| Smc3           | 1.3                         | Subunit of the cohesin complex that associates with SMC1 required for sister chromatid cohesion        |
| Scc3/Irr1      | 1.3                         | Subunit of the cohesin complex, thought to close the cohesion ring                                     |
| Hda1           | -1.7                        | Putative catalytic subunit of a class II histone deacetylase complex                                   |
| Mcm4           | -1.9                        | Essential helicase component of heterohexameric MCM2-7 complexes                                       |
| Rsc1           | -2.0                        | Component of the RSC chromatin remodeling complex                                                      |

| <b>Protein</b> | <b>Fold Change<br/>+ HU</b> | <b>Description</b>                                                                                                                                              |
|----------------|-----------------------------|-----------------------------------------------------------------------------------------------------------------------------------------------------------------|
| Rdh54          | 2.6                         | DNA-dependent ATPase with function in homologous recombination                                                                                                  |
| Spt7           | 1.7                         | SAGA core component that may regulate Spt20 and Ada1, components of the SAGA complex.                                                                           |
| Ybp2           | 1.6                         | Central kinetochore associated protein                                                                                                                          |
| Cdc28          | 1.6                         | Associates with six B-type cyclins to direct mitotic spindle assembly in S-phase and spindle function during mitosis                                            |
| Rpt4           | 1.6                         | ATPase of the 19S regulatory particle of the 26S proteasome. One of six ATPases of the regulatory particle, involved in degradation of ubiquitinated substrates |
| Mgm101         | 1.5                         | Role in mitochondrial DNA recombinational repair and interstrand cross-link repair                                                                              |
| Mph1           | 1.4                         | 3'-5' DNA helicase involved in error-free bypass of DNA lesions                                                                                                 |
| Top2           | 1.4                         | Type II topoisomerase that catalyzes decatenation of DNA                                                                                                        |
| Rsc9           | -1.9                        | Component of the RSC chromatin remodeling complex which targets genes regulated by stress                                                                       |
| Set3           | -2.7                        | Component of the 7-subunit HDAC complex with a role in transcription                                                                                            |
| Vps72          | -2.7                        | Part of the SWR1 complex, exchanges histone variant H2AZ (Htz1p) for chromatin-bound histone H2A                                                                |
