# Supplementary material for: A Novel Rrm3 Function in Restricting DNA Replication via an Orc5-Binding Domain Is Genetically Separable from Rrm3 Function as an ATPase/Helicase in Facilitating Fork Progression
Source: PubMed Central journal article supplement (PMC5140057; doi:10.1371/journal.pgen.1006451), 2016-12-06
Supplement: pgen.1006451.s006.pdf [file pgen.1006451.s006.pdf]

S2 TABLE. Yeast Strains used in this study.

| Strain ID1           | Genotype                                                                                                                                                                                                                  |
|----------------------|---------------------------------------------------------------------------------------------------------------------------------------------------------------------------------------------------------------------------|
| EGY48 <sup>1</sup>   | <i>MATα ura3-52, trp1Δ63, his3Δ200, LexA<sub>op (x6)</sub>-LEU2</i>                                                                                                                                                       |
| KHSY304 <sup>2</sup> | <i>MATα ura3-52, trp1Δ63, his3Δ200, rrm3::TRP1</i>                                                                                                                                                                        |
| KHSY745              | <i>ura3-52/ura3-52, trp1Δ63/trp1Δ63, his3Δ200/his3Δ200, RRM3/rrm3::TRP1, MRC1/mrc1::HIS3</i>                                                                                                                              |
| KHSY802              | <i>MATα ura3-52, leu2Δ1, trp1Δ63, his3Δ200, lys2ΔBgl, hom3-10, ade2Δ1, ade8, YEL069C::URA3</i>                                                                                                                            |
| KHSY1063             | <i>MATα ura3-52, leu2Δ1, trp1Δ63, his3Δ200, lys2ΔBgl, hom3-10, ade2Δ1, ade8, YEL069C::URA3, rrm3::TRP1</i>                                                                                                                |
| KHSY1065             | <i>ura3-52/ura3-52, leu2Δ1/leu2Δ1, trp1Δ63/trp1Δ63, his3Δ200/his3Δ200, lys2ΔBgl/lys2ΔBgl, hom3-10/hom3-10, ade2Δ1/ade2Δ1, ade8/ade8. YEL069C::URA3/YEL069C::URA3, RAD53/rad53::his3, SML1/sml1::G418, RRM3/rrm3::TRP1</i> |
| KHSY1133             | <i>ura3-52, lys2-801 amber, ade2-101 ochre, trp1-Δ63, his3-Δ200, leu2-Δ1, rad9::G418, rrm3::URA3</i>                                                                                                                      |
| KHSY1157             | <i>ura3-52/ura3-52, leu2Δ1/leu2Δ1, trp1Δ63/trp1Δ63, his3Δ200/his3Δ200, lys2ΔBgl/lys2ΔBgl, hom3-10/hom3-10, ade2Δ1/ade2Δ1, ade8/ade8. YEL069C::URA3/YEL069C::URA3</i>                                                      |
| KHSY1557             | <i>MATα ura3-52, leu2Δ1, trp1Δ63, his3Δ200, lys2ΔBgl, hom3-10, ade2Δ1, ade8, YEL069C::URA3, mph1::HIS3</i>                                                                                                                |
| KHSY1713             | <i>MATα ura3-52, leu2Δ1, trp1Δ63, his3Δ200, lys2ΔBgl, hom3-10, ade2Δ1, ade8, YEL069C::URA3, rrm3::TRP1, mph1::HIS3</i>                                                                                                    |
| KHSY2331             | <i>MATα ura3-52, leu2Δ1, trp1Δ63, his3Δ200, lys2ΔBgl, hom3-10, ade2Δ1, ade8, YEL069C::URA3, lig4::loxP-G418-loxP</i>                                                                                                      |
| KHSY4570             | <i>MATα ura3-52, trp1Δ63, his3Δ200</i>                                                                                                                                                                                    |
| KHSY4743             | <i>ura3-52/ura3-52, trp1Δ63/trp1Δ63, his3Δ200/his3Δ200, RRM3/rrm3::TRP1</i>                                                                                                                                               |
| KHSY5143             | <i>MATα ura3-52, trp1Δ63, his3Δ200, arg4::G418, lys2::HIS3</i>                                                                                                                                                            |
| KHSY5144             | <i>MATα ura3-52, trp1Δ63, his3Δ200, arg4::G418, lys2::HIS3, rrm3::TRP1</i>                                                                                                                                                |
| KHSY5145             | <i>MATα ura3-52, leu2Δ1, trp1Δ63, his3Δ200, lys2ΔBgl, hom3-10, ade2Δ1, ade8, YEL069C::URA3, rad5::HIS3</i>                                                                                                                |
| KHSY5146             | <i>MATα ura3-52, leu2Δ1, trp1Δ63, his3Δ200, lys2ΔBgl, hom3-10, ade2Δ1, ade8, YEL069C::URA3, rrm3::TRP1, rad5::HIS3</i>                                                                                                    |
| KHSY5147             | <i>MATα ura3-52, leu2Δ1, trp1Δ63, his3Δ200, lys2ΔBgl, hom3-10, ade2Δ1, ade8, YEL069C::URA3, rdh54::HIS3</i>                                                                                                               |
| KHSY5148             | <i>MATα ura3-52, leu2Δ1, trp1Δ63, his3Δ200, lys2ΔBgl, hom3-10, ade2Δ1, ade8, YEL069C::URA3, rrm3::TRP1, rdh54::HIS3</i>                                                                                                   |
| KHSY5149             | <i>MATα ura3-52, leu2Δ1, trp1Δ63, his3Δ200, lys2ΔBgl, hom3-10, ade2Δ1, ade8, YEL069C::URA3, rad5::HIS3 rdh54::G418</i>                                                                                                    |

KHSY5150 *MATa ura3-52, leu2Δ1, trp1Δ63, his3Δ200, lys2ΔBgl, hom3-10, ade2Δ1, ade8, YEL069C::URA3, rrm3::TRP1, rdh54::HIS3, rad5::TRP1*

KHSY5151 *MATa ura3-52, leu2Δ1, trp1Δ63, his3Δ200, lys2ΔBgl, hom3-10, ade2Δ1, ade8, YEL069C::URA3, set3::HIS3*

KHSY5152 *MATa ura3-52, leu2Δ1, trp1Δ63, his3Δ200, lys2ΔBgl, hom3-10, ade2Δ1, ade8, YEL069C::URA3, rrm3::TRP1, set3::HIS3*

KHSY5153 *MATa ura3-52, leu2Δ1, trp1Δ63, his3Δ200, lys2ΔBgl, hom3-10, ade2Δ1, ade8, YEL069C::URA3, tof1::HIS3*

KHSY5154 *MATa ura3-52, leu2Δ1, trp1Δ63, his3Δ200, lys2ΔBgl, hom3-10, ade2Δ1, ade8, YEL069C::URA3, rrm3::TRP1, tof1::HIS3*

KHSY5155 *MATa ura3-52, leu2Δ1, trp1Δ63, his3Δ200, lys2ΔBgl, hom3-10, ade2Δ1, ade8, YEL069C::URA3, ies4::HIS3*

KHSY5156 *MATa ura3-52, leu2Δ1, trp1Δ63, his3Δ200, lys2ΔBgl, hom3-10, ade2Δ1, ade8, YEL069C::URA3, rrm3::TRP1, ies4::HIS3*

KHSY5157 *MATa ura3-52, leu2Δ1, trp1Δ63, his3Δ200, lys2ΔBgl, hom3-10, ade2Δ1, ade8, YEL069C::URA3, hda1::HIS3*

KHSY5158 *MATa ura3-52, leu2Δ1, trp1Δ63, his3Δ200, lys2ΔBgl, hom3-10, ade2Δ1, ade8, YEL069C::URA3, rrm3::TRP1, hda1::HIS3*

KHSY5159 *MATa ura3-52, leu2Δ1, trp1Δ63, his3Δ200, lys2ΔBgl, hom3-10, ade2Δ1, ade8, YEL069C::URA3, mgm101::HIS3*

KHSY5160 *MATa ura3-52, leu2Δ1, trp1Δ63, his3Δ200, lys2ΔBgl, hom3-10, ade2Δ1, ade8, YEL069C::URA3, rrm3::TRP1, mgm101::HIS3*

KHSY5161 *MATa ura3-52, leu2Δ1, trp1Δ63, his3Δ200, lys2ΔBgl, hom3-10, ade2Δ1, ade8, YEL069C::URA3, sml1::G418*

KHSY5162 *MATa ura3-52, leu2Δ1, trp1Δ63, his3Δ200, lys2ΔBgl, hom3-10, ade2Δ1, ade8, YEL069C::URA3, sml1::G418, rrm3::TRP1*

KHSY5163 *MATa ura3-52, leu2Δ1, trp1Δ63, his3Δ200, lys2ΔBgl, hom3-10, ade2Δ1, ade8, YEL069C::URA3, sml1::G418, rrm3::TRP1, rad53::HIS3*

KHSY5164 *ura3-52/ura3-52, leu2Δ1/leu2Δ1, trp1Δ63/trp1Δ63, his3Δ200/his3Δ200, lys2ΔBgl/lys2ΔBgl, hom3-10/hom3-10, ade2Δ1/ade2Δ1, ade8/ade8. YEL069C::URA3/YEL069C::URA3, rdh54::HIS3/rdh54::HIS3*

KHSY5165 *ura3-52/ura3-52, leu2Δ1/leu2Δ1, trp1Δ63/trp1Δ63, his3Δ200/his3Δ200, lys2ΔBgl/lys2ΔBgl, hom3-10/hom3-10, ade2Δ1/ade2Δ1, ade8/ade8. YEL069C::URA3/YEL069C::URA3, rrm3::TRP1/rrm3::TRP1, rdh54::HIS3/rdh54::HIS3*

KHSY5166 *ura3-52/ura3-52, leu2Δ1/leu2Δ1, trp1Δ63/trp1Δ63, his3Δ200/his3Δ200, lys2ΔBgl/lys2ΔBgl, hom3-10/hom3-10, ade2Δ1/ade2Δ1, ade8/ade8. YEL069C::URA3/YEL069C::URA3, rrm3::TRP1/rrm3::TRP1*

KHSY5167 *ura3-52/ura3-52, leu2Δ1/leu2Δ1, trp1Δ63/trp1Δ63, his3Δ200/his3Δ200, lys2ΔBgl/lys2ΔBgl, hom3-10/hom3-10, ade2Δ1/ade2Δ1, ade8/ade8. YEL069C::URA3/YEL069C::URA3, RRM3/rrm3::TRP1, RDH54/rdh54::HIS3*

KHSY5168 *ura3-52/ura3-52, leu2Δ1/leu2Δ1, trp1Δ63/trp1Δ63, his3Δ200/his3Δ200, lys2ΔBgl/lys2ΔBgl, hom3-10/hom3-10, ade2Δ1/ade2Δ1, ade8/ade8. YEL069C::URA3/YEL069C::URA3, RRM3/rrm3::TRP1*

KHSY5169 *ura3-52/ura3-52, leu2Δ1/leu2Δ1, trp1Δ63/trp1Δ63, his3Δ200/his3Δ200, lys2ΔBgl/lys2ΔBgl, hom3-10/hom3-10, ade2Δ1/ade2Δ1, ade8/ade8. YEL069C::URA3/YEL069C::URA3, RDH54/rdh54::HIS3*

KHSY5170 *ura3-52/ura3-52, leu2Δ1/leu2Δ1, trp1Δ63/trp1Δ63, his3Δ200/his3Δ200, lys2ΔBgl/lys2ΔBgl, hom3-10/hom3-10, ade2Δ1/ade2Δ1, ade8/ade8. YEL069C::URA3/YEL069C::URA3, RRM3/rrm3::TRP1, rdh54::HIS3/rdh54::HIS3*

KHSY5171 *ura3-52/ura3-52, leu2Δ1/leu2Δ1, trp1Δ63/trp1Δ63, his3Δ200/his3Δ200, lys2ΔBgl/lys2ΔBgl, hom3-10/hom3-10, ade2Δ1/ade2Δ1, ade8/ade8. YEL069C::URA3/YEL069C::URA3, rrm3::TRP1/rrm3::TRP1, RDH54/rdh54::HIS3*

KHSY5173 *MATa ura3-52, leu2Δ1, trp1Δ63, his3Δ200, lys2ΔBgl, hom3-10, ade2Δ1, ade8, YEL069C::URA3, rrm3::TRP1, mph1::HIS3, rad5::LEU2*

KHSY5177 *MATa ura3-52, leu2Δ1, trp1Δ63, his3Δ200, lys2ΔBgl, hom3-10, ade2Δ1, ade8, YEL069C::URA3, mph1::HIS3, rad5::LEU2*

KHSY5180 *MATa ura3-52, leu2Δ1, trp1Δ63, his3Δ200, lys2ΔBgl, hom3-10, ade2Δ1, ade8, YEL069C::URA3, rad54::HIS3*

KHSY5183 *MATa ura3-52, leu2Δ1, trp1Δ63, his3Δ200, lys2ΔBgl, hom3-10, ade2Δ1, ade8, YEL069C::URA3, rad54::HIS3, rrm3::TRP1*

KHSY5186 *MATa ura3-52, leu2Δ1, trp1Δ63, his3Δ200, lys2ΔBgl, hom3-10, ade2Δ1, ade8, YEL069C::URA3, rad51::HIS3*

KHSY5189 *MATa ura3-52, leu2Δ1, trp1Δ63, his3Δ200, lys2ΔBgl, hom3-10, ade2Δ1, ade8, YEL069C::URA3, rad51::HIS3, rrm3::TRP1*

KHSY5192 *MATa ura3-52, leu2Δ1, trp1Δ63, his3Δ200, lys2ΔBgl, hom3-10, ade2Δ1, ade8, YEL069C::URA3, Rrm3.myc.HIS3*

KHSY5193 *MATa ura3-52, leu2Δ1, trp1Δ63, his3Δ200, lys2ΔBgl, hom3-10, ade2Δ1, ade8, YEL069C::URA3, rrm3-ΔN186.myc.HIS3*

KHSY5194 *MATa ura3-52, leu2Δ1, trp1Δ63, his3Δ200, lys2ΔBgl, hom3-10, ade2Δ1, ade8, YEL069C::URA3, rrm3-ΔN212.myc.HIS3*

KHSY5195 *MATa ura3-52, leu2Δ1, trp1Δ63, his3Δ200, lys2ΔBgl, hom3-10, ade2Δ1, ade8, YEL069C::URA3, rrm3-ΔK260A.myc.HIS3*

KHSY5196 *MATa ura3-52, leu2Δ1, trp1Δ63, his3Δ200, lys2ΔBgl, hom3-10, ade2Δ1, ade8, YEL069C::URA3, rrm3-ΔK260D.myc.HIS3*

KHSY5197 *MATa ura3-52, leu2Δ1, trp1Δ63, his3Δ200, Rrm3.myc.HIS3, Orc5.V5.6xHIS*

KHSY5198 *MATa ura3-52, leu2Δ1, trp1Δ63, his3Δ200, rrm3-ΔN186.myc.HIS3, Orc5.V5.6xHIS*

KHSY5199 *MATa ura3-52, leu2Δ1, trp1Δ63, his3Δ200, rrm3-ΔN212.myc.HIS3, Orc5.V5.6xHIS*

---

<sup>1</sup> From Gyuris *et al.* (1993) *Cell* **75**(4): p. 791-803.

<sup>2</sup> All KHSY strains are derived from the S288C background.
