# Supplementary material for: A Novel Rrm3 Function in Restricting DNA Replication via an Orc5-Binding Domain Is Genetically Separable from Rrm3 Function as an ATPase/Helicase in Facilitating Fork Progression
Source: PubMed Central journal article supplement (PMC5140057; doi:10.1371/journal.pgen.1006451), 2016-12-06
Supplement: pgen.1006451.s007.pdf [file pgen.1006451.s007.pdf]

S3 Table. Plasmids used in this study

| Plasmid | Description                                                               | Reference                   |
|---------|---------------------------------------------------------------------------|-----------------------------|
| pRS315  | <i>CEN/ARS, LEU2</i>                                                      | (Sikorski and Hieter, 1989) |
| pEG202  | LexA bait plasmid, <i>HIS3</i> , 2 $\mu$ m                                | (Estojak et al., 1995)      |
| pJG4-5* | <i>GAL1</i> promoter- <i>GAL4</i> <sub>AD</sub> , <i>TRP1</i> , 2 $\mu$ m | (Schmidt et al., 2002)      |
| pR5-28  | <i>CEN/ARS, LEU2, RAD5</i>                                                | (Pages et al., 2008)        |
| pR5-19  | <i>CEN/ARS, LEU2, rad5-C914A/C917A</i>                                    | (Pages et al., 2008)        |
| pKHS124 | <i>pJG-4-5*-RRM3</i>                                                      | (Schmidt et al., 2002)      |
| pKHS126 | <i>pEG202-RRM3</i>                                                        | (Schmidt et al., 2002)      |
| pKHS133 | <i>pEG202-rrm3-<math>\Delta</math>N54</i>                                 | (Schmidt et al., 2002)      |
| pKHS135 | <i>pEG202-rrm3<math>\Delta</math>N230</i>                                 | (Schmidt et al., 2002)      |
| pKHS136 | <i>pRS315-rrm3-<math>\Delta</math>N54</i>                                 | this study                  |
| pKHS137 | <i>pRS315-rrm3-<math>\Delta</math>N230</i>                                | this study                  |
| pKHS170 | <i>pRS315-RRM3</i>                                                        | this study                  |
| pKHS174 | <i>pRS315-rrm3-F41A/F42A</i>                                              | this study                  |
| pKHS183 | <i>pEG202-rrm3-F41A/F42A</i>                                              | (Schmidt et al., 2002)      |
| pKHS645 | <i>pRS315-rrm3-N<math>\Delta</math>142</i>                                | this study                  |
| pKHS646 | <i>pRS315-rrm3-<math>\Delta</math>N186</i>                                | this study                  |
| pKHS647 | <i>pRS315-rrm3-<math>\Delta</math>212</i>                                 | this study                  |
| pKHS648 | <i>pRS315-rrm3-K260A</i>                                                  | this study                  |
| pKHS649 | <i>pRS315-rrm3-K260D</i>                                                  | this study                  |
| pKHS653 | <i>peg202-rrm3-<math>\Delta</math>N186</i>                                | this study                  |
| pKHS654 | <i>pEG202-rrm3-<math>\Delta</math>N212</i>                                | this study                  |
| pKHS655 | <i>pEG202-rrm3-<math>\Delta</math>N230</i>                                | (Schmidt et al., 2002)      |
| pKHS656 | <i>pJG4-5*-ORC5</i>                                                       | this study                  |
| pKHS736 | <i>CEN/ARS,LEU2, rad5-Q1106D</i>                                          | this study                  |

Estojak, J., Brent, R., and Golemis, E.A. (1995). Correlation of two-hybrid affinity data with in vitro measurements. *Mol Cell Biol* 15, 5820-5829.

Pages, V., Bresson, A., Acharya, N., Prakash, S., Fuchs, R.P., and Prakash, L. (2008). Requirement of Rad5 for DNA polymerase zeta-dependent translesion synthesis in *Saccharomyces cerevisiae*. *Genetics* 180, 73-82.

- Schmidt, K.H., Derry, K.L., and Kolodner, R.D. (2002). *Saccharomyces cerevisiae* RRM3, a 5' to 3' DNA helicase, physically interacts with proliferating cell nuclear antigen. *J Biol Chem* 277, 45331-45337.
- Sikorski, R.S., and Hieter, P. (1989). A system of shuttle vectors and yeast host strains designed for efficient manipulation of DNA in *Saccharomyces cerevisiae*. *Genetics* 122, 19-27.
